1                    **A supervised statistical learning approach for accurate**  
2                    ***Legionella pneumophila* source attribution during outbreaks**

3  
4  
5    **Andrew H. Buultjens<sup>1,2</sup>, Kyra Y. L. Chua<sup>3</sup>, Sarah L. Baines<sup>1</sup>, Jason Kwong<sup>1,2,3</sup>, Wei Gao<sup>1</sup>, Zoe Cutcher<sup>4,5</sup>,**  
6    **Stuart Adcock<sup>4</sup>, Susan Ballard<sup>3</sup>, Mark B. Schultz<sup>3</sup>, Takehiro Tomita<sup>3</sup>, Nela Subasinghe<sup>3</sup>, Glen P. Carter<sup>1,2</sup>,**  
7    **Sacha J. Pidot<sup>1</sup>, Lucinda Franklin<sup>4</sup>, Torsten Seemann<sup>3,6</sup>, Anders Gonçalves Da Silva<sup>2,3</sup>, Benjamin P.**  
8    **Howden<sup>1,2,3,\*</sup>, Timothy P. Stinear<sup>1,2,\*</sup>**

9  
10    **Affiliations:**

11    <sup>1</sup>Department of Microbiology and Immunology at the Peter Doherty Institute for Infection and Immunity, The  
12    University of Melbourne, Victoria, Australia

13    <sup>2</sup>Doherty Applied Microbial Genomics, The Peter Doherty Institute for Infection and Immunity, Victoria, Australia

14    <sup>3</sup>Microbiological Diagnostic Unit Public Health Laboratory at the Peter Doherty Institute for Infection and Immunity,  
15    The University of Melbourne, Victoria, Australia.

16    <sup>4</sup>Health Protection Branch, Department of Health and Human Services, Victoria, Australia

17    <sup>5</sup>National Centre for Epidemiology and Population Health, Australian National University, Canberra, Australia

18    <sup>6</sup>Victorian Life Sciences Computational Initiative, The University of Melbourne, Victoria, Australia

19  
20    **\*To whom correspondence may be addressed: [tstinear@unimelb.edu.au](mailto:tstinear@unimelb.edu.au), [bhowden@unimelb.edu.au](mailto:bhowden@unimelb.edu.au)**

21  
22    **Running title: *L. pneumophila* source tracking using genomics**

## 23 **Abstract**

24 Public health agencies are increasingly relying on genomics during Legionnaires' disease investigations.  
25 However, the causative bacterium (*Legionella pneumophila*) has an unusual population structure with  
26 extreme temporal and spatial genome sequence conservation. Furthermore, Legionnaires' disease  
27 outbreaks can be caused by multiple *L. pneumophila* genotypes in a single source. These factors can  
28 confound cluster identification using standard phylogenomic methods. Here, we show that a statistical  
29 learning approach based on  
30 *L. pneumophila* core genome single nucleotide polymorphism (SNP) comparisons eliminates ambiguity for  
31 defining outbreak clusters and accurately predicts exposure sources for clinical cases. We illustrate the  
32 performance of our method by genome comparisons of 234 *L. pneumophila* isolates obtained from patients  
33 and cooling towers in Melbourne, Australia between 1994 and 2014. This collection included one of the  
34 largest reported Legionnaires' disease outbreaks, involving 125 cases at an aquarium. Using only sequence  
35 data from *L. pneumophila* cooling tower isolates and including all core genome variation, we built a  
36 multivariate model using discriminant analysis of principal components (DAPC) to find cooling tower-  
37 specific genomic signatures, and then used it to predict the origin of clinical isolates. Model assignments  
38 were 93% congruent with epidemiological data, including the aquarium Legionnaires' outbreak and three  
39 other unrelated outbreak investigations. We applied the same approach to a recently described  
40 investigation of Legionnaires' disease within a UK hospital and observed model predictive ability of 86%.  
41 We have developed a promising means to breach *L. pneumophila* genetic diversity extremes and provide  
42 objective source attribution data for outbreak investigations.

43

## 44 **Importance**

45 Microbial outbreak investigations are moving to a paradigm where whole genome sequencing and  
46 phylogenetic trees are used to support epidemiological investigations. It's critical that outbreak source  
47 predictions are accurate, particularly for pathogens like *Legionella pneumophila*, which can spread widely  
48 and rapidly via cooling system aerosols causing Legionnaires' disease. Here, by studying hundreds of  
49 *Legionella pneumophila* genomes collected over 21 years around a major Australian city, we uncovered  
50 limitations with the phylogenetic approach that could lead to misidentification of outbreak sources. We  
51 implement instead a statistical learning technique that eliminates the ambiguity of inferring disease  
52 transmission from phylogenies. Our approach takes geolocation information and core genome variation  
53 from environmental *L. pneumophila* isolates to build statistical models that predict with high confidence  
54 the environmental source of clinical *L. pneumophila* during disease outbreaks. We show the versatility of  
55 the technique by applying it to unrelated Legionnaires' disease outbreaks in Australia and the UK.

56

## 57 Introduction

58 Legionellae are Gram-negative bacteria that replicate within free-living aquatic amoebae and are present in  
59 aquatic environments worldwide. These bacteria can proliferate in man-made water systems and cause  
60 large outbreaks of pneumonia known as Legionnaires' disease when contaminated water is aerosolized and  
61 inhaled (1). The majority of human infections are caused by *Legionella pneumophila* serogroup 1 (2). Public  
62 health investigations of Legionnaires' disease outbreaks are typically supported by molecular typing  
63 methods to establish the likely source of the bacteria and the extent of the outbreak. Investigations usually  
64 proceed with the assumption that a single *Legionella* genotype is responsible for an environmental point  
65 source reservoir (3). Traditional molecular typing methods described for fingerprinting Legionellae include  
66 pulsed-field gel electrophoresis (PFGE) and sequence-based typing (SBT) (4). Increasingly, whole genome  
67 sequencing (WGS) is being employed to investigate individual *Legionella* outbreaks and the insights  
68 obtained from these high-resolution comparisons are challenging our expectations regarding common-  
69 source outbreaks, which usually are characterized by a single strain or genotype (5-9). It is becoming  
70 evident that outbreaks can be caused by multiple co-circulating *L. pneumophila* genotypes (5, 10) and that  
71 *L. pneumophila* core genomes can be surprisingly conserved across space and time (8, 11-13).

72

73 Melbourne is in the state of Victoria and it is the second largest city in Australia with a population  
74 approaching five million inhabitants, and considered the ninth largest city in the Southern Hemisphere.  
75 Legionellosis has been a notifiable disease in Victoria since 1979 and there are 50-100 cases reported each  
76 year, most occurring in the greater metropolitan region of Melbourne (14). The Microbiological Diagnostic  
77 Unit Public Health Laboratory (MDU PHL) is Victoria's State Reference Laboratory for the characterization  
78 and typing of *Legionella* spp. The laboratory's collection includes isolates from a particularly noteworthy  
79 outbreak at the Melbourne Aquarium in April 2000. This was the largest single episode of Legionellosis  
80 reported in Australia (15), approximately three months after the aquarium was opened to visitors, with  
81 construction of the site completed in December 1999. It resulted in 125 confirmed cases, with positive  
82 cultures obtained from 11 patients. Our isolate collection also spanned 28 other potential legionellosis  
83 outbreaks or infection clusters, for which at least one culture isolate had been obtained.

84

85 In this study, we used comparative genomics to explore the population structure of 234 *Legionella*  
86 *pneumophila* isolates recovered from human and environmental sources submitted to the MDU PHL in  
87 Melbourne over a 21-year period. This collection included 11 clinical and 14 environmental isolates from  
88 the Aquarium outbreak and 42 clinical and 50 environmental isolates from 28 other likely point source case

89 clusters. We also assessed genomic data from a recently described investigation of Legionnaires' cases at a  
90 UK hospital (8). The aim of this project was to develop a robust genomic approach that would surmount the  
91 unusual population structure of  
92 *L. pneumophila* and assist identification of case clusters and source tracking efforts during Legionnaires'  
93 disease outbreak investigations.

94

## 95 **Results**

96 **Isolates and epidemiology.** There were 234 *Legionella pneumophila* serogroup 1 (Lpn-SG 1) isolates  
97 obtained across a 21-year period between 1994 and 2014. Initial MLST analysis indicated that 180 isolates  
98 (77%) belonged to ST30. The collection comprised 180 clinical isolates of respiratory origin (sputum or  
99 bronchoscopy specimens) and 64 environmental isolates recovered from cooling tower water samples. All  
100 isolates were collected in the state of Victoria with the exception of six isolates from patients who were  
101 exposed elsewhere. Further information for each isolate is available in Table S1, including NCBI SRA  
102 accession numbers. One hundred and ten of the 234 isolates were epidemiologically associated with 29  
103 formally investigated case clusters or outbreaks, designated as outbreaks A-AC (Table S1). The majority of  
104 these cases occurred within a 42 km radius of Melbourne city center and over a 16-year period. Outbreak  
105 A, the Melbourne Aquarium outbreak, was the largest (15).

106

107 **Complete genome sequence of *Legionella pneumophila* serogroup 1 isolate Lpm7613.** Before this study,  
108 there were no closed, fully assembled ST30 *L. pneumophila* genomes. Thus, to ensure identification of  
109 maximum genetic variation among this dominant ST in our collection, we first established a ST30 reference  
110 genome sequence, selecting a clinical isolate from the Melbourne Aquarium outbreak (Lpm7613). The  
111 finished genome consisted of a single circular 3,261,562 bp chromosome (38.3% GC) and a 129,875 bp  
112 circular plasmid (pLpm7613) (Fig. S1). Although the chromosome indicated this genome belonged to the  
113 same lineage as *L. pneumophila* Philadelphia (Fig. 1A), the plasmid shared 100% nucleotide identity with  
114 pLPP reported in *L. pneumophila* Paris, but 2kb shorter in length (16). A total of 2,891 chromosomal  
115 protein-coding sequences (CDS), 43 tRNA genes and nine rRNA loci were predicted using Prokka (17).  
116 CRISPR-Cas regions were not detected (18).

117

118 **Assessment of *L. pneumophila* population structure.** Sequence reads from the other 233 genomes and the  
119 ten selected publicly available completed genomes were mapped to the chromosome of reference strain  
120 Lpm7613. Approximately 90% of the Lpm7613 genome was present in all genomes (*i.e.*, core), with 188,049

121 variable core nucleotide positions identified. Population structure analyses using an unsupervised Bayesian  
122 clustering approach revealed six distinct groups (BAPS groups) (Fig. 1A). Comparison of intra- and inter-  
123 BAPS group pairwise SNP distances confirmed the validity of these clusters and highlighted the extensive  
124 genetic variation among this Lpn-SG1 population (Fig. 1C). The exceptions were BAPS groups 3 and 4, which  
125 classified isolates across two clades, and is likely explained by recombination. Most striking, however, was  
126 the lack of diversity within the 186 genomes comprising BAPS group 5 (hereafter referred to as BAPS-5),  
127 with a median core SNP distance of only 5 SNPs (IQR 3 – 7). Isolates dispersed across time and space  
128 (including isolates from England, New South Wales, South Australia and Tasmania) were scattered  
129 throughout the entire phylogeny. All 180 ST30 isolates were encompassed by BAPS-5, as was ST37 *L.*  
130 *pneumophila* Philadelphia (Philadelphia, USA), ST211 *L. pneumophila* ATCC 43290 (Denver, USA) and ST733  
131 *L. pneumophila* Thunder Bay (Ontario, Canada) (Fig. 1A,B). The median inter-BAPS group distances ranged  
132 between 27,506 to 63,136 SNPs (Fig. 1C), highlighting that there is also substantial genetic diversity among  
133 Lpn-SG1 isolates circulating in Melbourne.

134

135 A rooted maximum likelihood phylogeny of the population was then inferred using the 181,633 non-  
136 recombining core SNP loci. The phylogenomic tree reflected the BAPS clusters with BAPS-5 forming a  
137 distinct, well-supported lineage (Fig. 1A). The separation of the three North American reference isolates  
138 from the Melbourne ST30 isolates is suggestive of contemporaneous global dispersal of this BAPS-5 lineage  
139 (Fig. 1A,B). All BAPS groups displayed monophyletic origins with the exception of BAPS-3 and BAPS-4. BAPS-  
140 3 had a single isolate of paraphyletic origin that shared a most recent common ancestor (MRCA) with BAPS-  
141 2 while BAPS-4 contained two paraphyletic sub-clades, one of which shared a MRCA with the majority of  
142 BAPS-3 isolates.

143

144 **Impact of recombination.** Recombination is a driving force in the evolution of the Legionellae (5, 7, 19-22).  
145 Therefore, to further understand the structure and evolution of this Lpn-SG1 population we assessed the  
146 impact of DNA exchange. There was evidence of extensive recombination among isolates across BAPS  
147 groups 1-4, and 6 with approximately 3% of variable nucleotide sites impacted relative to the Lpm7613  
148 reference chromosome. The detection of two paraphyletic groups (BAPS-3 and BAPS-4) is likely explained  
149 by ancestral recombination among the component sub-clades. In comparison, there was little  
150 recombination evident among BAPS-5 isolates (Fig. S2), in accord with the core SNP phylogeny described  
151 above, and suggesting the relatively recent emergence of this *L. pneumophila* lineage. After removal of  
152 putative sequences affected by recombination, tree branch lengths showed no correlation with isolation  
153 dates ( $r^2=0.116$ ). This observation indicates that nucleotide substitutions in the population have not been

154 evolving under a molecular clock model, thus limiting estimates for dates of emergence for particular  
155 lineages.

156

157 **Genomic molecular epidemiology of local outbreaks.** We next compared only the 180 ST30 genomes to  
158 our Lpm7613 reference genome, and again confirmed the very restricted genomic diversity within this  
159 lineage (median core SNP distance was 6 SNPs (IQR 4 – 9), with five outlier genomes, impacted by  
160 recombination. (Fig. 1B,C Fig. S2). Within this reconstructed core-genome ST30-specific phylogeny, many  
161 but not all epidemiologically-related isolates formed distinct, well-supported, monophyletic clades. In some  
162 instances, epidemiologically-associated isolates spanned multiple clades (outbreaks A, B, C, D and K) (Fig.  
163 1B). In addition, Outbreak A (the Melbourne aquarium outbreak), which was previously considered to  
164 represent infections caused by a single clone (Table S1) (15), actually contained five distinct genotypes (A1-  
165 A5) (Fig 1B,C).

166

167 The analysis of environmental surveillance isolates provided an ideal means to gain insights into the  
168 diversity within potential reservoirs of Lpn-SG1 - diversity that might enable prospective source tracking. A  
169 phylogeographic analysis was therefore undertaken to assess the relationship between 64 environmental  
170 Melbourne metropolitan isolates against their 11 cooling tower sampling locations. Based on variation in  
171 core SNPs, striking geographical structure was observed, with the majority of isolates from common cooling  
172 towers tightly clustering in the phylogeny (Fig. 2A). Comparisons of pairwise core SNPs depicted smaller  
173 within group diversity and larger between location group diversity, further indicating the existence of  
174 geographical population structure (Fig. 2B). This structure among the environmental Lpn-SG1 isolates  
175 suggested it might be possible to use the genome data to build models predictive of environmental source  
176 to assist epidemiological efforts during outbreak investigations.

177

178 **A multivariate statistical model for source attribution.** To enhance resolution and try to detect outbreak-  
179 specific genomic signals, a supervised statistical learning approach called Discriminant Analysis of Principal  
180 Components (DAPC) (23) was employed. DAPC is a linear discriminant analysis (LDA) that accommodates  
181 discrete genetic-based predictors by first transforming the genetic data into continuous Principal  
182 Components (PC) and building predictive classification models. The PCs are used to build discriminant  
183 functions (DF) under the constraint that they must minimize within group variance, and maximize variance  
184 between groups. Infection clusters were defined *a priori* from the epidemiological findings, and training  
185 (environmental) isolates were used to establish the discriminant functions. The model was then be used to  
186 estimate the posterior probability of membership for an unknown (*e.g.* clinical) isolate for each pre-

187 specified infection cluster given the training data. Here, we used 43 of the 64 environmental isolates in the  
188 training set (cooling tower isolates originating from epidemiologically defined infection clusters that  
189 possessed at least one environmental and clinical representative), under the assumption that each  
190 outbreak was caused by exposure to a point source of Lpn-SG1. We used core genome SNPs from only  
191 environmental Lpn-SG1 genomes to build the classifier (24).

192

193 Outbreak-associated environmental Lpn-SG1 were grouped *a priori* into training set groups based on the  
194 origin of the cooling towers from which they were isolated (see model building details in methods). The DFs  
195 were then used to classify 15 clinical isolates that had been independently assigned based on  
196 epidemiological data to the training set groups, hereon referred to as the validation genomes (Table S1).  
197 The input matrix for DAPC was an alignment of 714 non-recombinogenic SNPs variable among the 43  
198 environmental genomes. Plots depicting the separation of isolates according to the first two discriminant  
199 functions and the amount of variation explained is shown (Fig. 3). A model was trained using the first four  
200 principal components (PC), as this was found to be optimal (see methods). We next classified our clinical  
201 validation genomes using the model and found a 93% match between our model's assignment and that  
202 proposed by the epidemiological data (Fig. 4A,B). These data show that despite the high level of genome  
203 conservation and the presence of multiple genotypes within a single environmental source, it is possible to  
204 utilize signature differences in core genome SNPs to build predictive probabilistic classification models. The  
205 single discrepancy between model predictions and epidemiological groupings was an infection cluster C  
206 genome that was predicted as originating from the Melbourne Aquarium. Interestingly, cluster C was  
207 located closest to the Melbourne Aquarium at a distance of approximately 500 metres. Given the proximity  
208 of clusters A and C, these data may indicate cooling towers were seeded from a common *L. pneumophila*  
209 source. In order to appraise the utility of this method beyond a large urban setting and the ST30 genotype,  
210 we built a sister model using 31 ST1 environmental *L. pneumophila* genomes from a previously published  
211 hospital investigation in Essex, UK, and used it to predict the origins of seven nosocomial clinical isolates  
212 (Fig. 3A, Table S1) (8). Here, the model was trained using an alignment of 59 non-recombinogenic SNPs  
213 among the 31 environmental genomes and retaining the first 15 PCs, as this was found to be optimal. As  
214 with the Melbourne disease clusters, the model performed very well. For 86% of the clinical isolates there  
215 was a match between the model's ward assignment and the origin suggested by epidemiology (Fig. 4A,B).  
216 Again, a single discrepancy occurred with a ward G genome predicted to originate from ward A. Wards A  
217 and G were co-located on the same corner and level of a common building, again suggesting a common *L.*  
218 *pneumophila* source (8). As before, isolates from a common source would be miss-assigned by the model,  
219 owing to the lack of location-specific genomic variants.

220

221 **Core genome multilocus sequence typing (cgMLST) has reduced discrimination.** In order to evaluate the  
222 utility of the recently described cgMLST scheme for source tracking (25, 26), we trained new DAPC models  
223 for both the Melbourne and Essex hospital datasets using a matrix of allelic integers derived from SNP  
224 profiles of the 1,529 cgMLST loci (Fig. 3B). When using the first one and seven PCs, we observed only 60%  
225 and 71% concordance between our model's assignment and that predicted by the epidemiological data for  
226 the Melbourne and Essex hospital datasets, respectively (Fig. 4A,C).

227

## 228 **Discussion**

229 In this study, we have retrospectively examined a large collection of 234 clinical and environmental isolates  
230 Lpn-SG1 isolates spanning 29 defined outbreaks. Isolates were collected over wide temporal and spatial  
231 scales and detailed genomic comparisons revealed wide extremes Lpn-SG1 genetic diversity among distinct  
232 genomic populations; a phenomenon not fully appreciated from previous genomic investigations that have  
233 sampled less extensively and focused on single outbreaks (5, 6, 27). Most striking in our collection was the  
234 high sequence conservation and dominance of a single genotype (BAPS-5, ST30), shared by 77% of isolates  
235 with a median core SNP distance of only 5 SNPs across 21 years. In agreement with our findings, two recent  
236 population genomic investigations of Lpn-SG1 also describe the unusual restriction in core genome diversity  
237 (8, 12).

238

239 Based on our previous experience with other bacterial pathogens (28) and reports in the literature of  
240 Legionnaires' disease outbreak investigations using genomics (27, 29) - we expected to be able to use Lpn-  
241 SG1 genomic comparisons and develop genetic rule-in or rule-out criteria to guide outbreak assessment  
242 and source attribution. For example, we recently proposed a 'traffic-light' system for *Listeria*  
243 *monocytogenes* based on SNP difference cutoffs of 'likely related', 'possibly-related' and 'not-related' (28).  
244 This approach has also been proposed for *L. pneumophila* (25). A comparison of genotyping approaches  
245 using 335 Lpn isolates, including 106 from the European Society for Clinical Microbiology Study Group's  
246 *Legionella Typing Panel*, proposed an escalating, hierarchical approach to genotyping, beginning with an  
247 extended 50-gene MLST scheme up to a 1529-gene cgMLST (25, 26).

248

249 The analysis of the population structure of Lpn-SG1 presented here indicates that SNP-based typing with  
250 threshold cut-offs, whether they are based on seven genes, 50 genes, 1500 genes or whole genomes will  
251 not necessarily provide sufficient discriminative power. These genotyping approaches will be confounded  
252 by the presence of (i) indistinguishable Lpn-SG1 genotypes present in unrelated cases and (ii) polyclonal



253 outbreaks. Our retrospective analysis of the Melbourne Aquarium outbreak illustrates clearly both these  
254 issues, where five distinct subtypes were recovered from 25 clinical and environmental isolates (Fig. 1B).  
255 There is a growing awareness of single source, polyphyletic Lpn-SG1 outbreaks (8, 10, 13, 30, 31). These  
256 data all point to the need for a different approach in order to use molecular epidemiology and genomics in  
257 support of *Legionella* outbreak investigations.

258

259 We address this issue by exploiting all core genome information to train probabilistic classification models.  
260 Our DAPC analysis demonstrates that it is possible to build predictive models based on Lpn-SG1  
261 environmentally derived genomes that help in identifying the source of clinical isolates during complex  
262 outbreak investigations in both the community and hospital environments (Fig. 4). By including all core SNP  
263 variation, DAPC was able to identify outbreak-specific genotypes, even when the source of the outbreak  
264 was polyclonal. This enabled us to build robust models that assigned validation set genomes, with known  
265 provenance, back to their original groupings with high concordance. The fact that this model was built  
266 purely from environmental surveillance isolates demonstrates that such approaches can be developed  
267 prospectively and be preexisting, ready to deploy at the onset of outbreaks.

268

269 In contrast to the high performance of the DAPC model developed from core genome SNPs, the model built  
270 using variants identified by cgMLST scheme had a lower matching rate when assigning validation genomes  
271 back to their putative epidemiological groupings (Fig. 4C). Despite cgMLST being a useful tool for broad  
272 Lpn-SG1 population structure assessment, our analysis suggests it may have insufficient resolution and thus  
273 predictive capacity for outbreak investigations.

274

275 The DAPC approach however, while promising, does not permit discrimination among isolates that do not  
276 belong to defined clusters. This is because the model assumes that the world is composed of only the  $k$   
277 groups used to train it, and therefore assigns unknown isolates to one of these groups, even if the isolate is  
278 known not to be part of any of the groups. One way to address this issue would be to create a single group  
279 classifier, which is trained with environmental samples. Isolates with low probability of membership to this  
280 single large group would then be excluded before being analyzed with the multi-group model. Future  
281 models could be further improved by adding epidemiological evidence (e.g. patient zip codes), and assess  
282 how that improves our assignment of a clinical isolate to a particular location. An advantage of a  
283 classification-based model is that its output could be distilled down to a zip code (or group of zip codes) and  
284 a probability that a clinical isolate is associated with the zip code (indicating uncertainty about the  
285 classification). This would obviate the need to interpret, and explain phylogenetic trees. Interpreting trees

286 is often not intuitive and trees may fail to communicate what action is required from a public health  
287 perspective. Crucial for such a classification approach to work however, is an extensive and temporally  
288 dynamic database of environmental Lpn-SG1 genotypes. That is, there would need to be ongoing  
289 surveillance and isolation of Lpn-SG1 from environmental sources. We are currently investigating how to  
290 implement such models.

291

292 The modeling approach, is not intended to be used in isolation, but rather employed as an adjunct to  
293 traditional epidemiological investigations. In this way, insights gained through epidemiological  
294 investigations can be informed by microbiological evidence from our predictive models. A limitation of our  
295 current models are the relatively small sample sizes. Performance measures for validation sets this small  
296 are often sensitive to slight perturbations in the data and may be influenced by small features of the data.  
297 However, as a proof-of-concept implementation of our approach, we have built two models from  
298 independent datasets, and both demonstrate high predictive capacity. More robust appraisals of model  
299 performance will require validation with larger datasets, collected prospectively.

300

301 From a biological perspective, the lack of genetic diversity in Lpn-SG1 over such coarse temporal and spatial  
302 scales is potentially explained by a reservoir of latent-state bacteria intermittently seeding warm water  
303 sources in the greater Melbourne region and is supported by the frequently-reported and widespread  
304 presence of *Legionella* species in drinking water supply systems (DWSS) (32-34). Independent studies  
305 propose similar hypotheses to explain the surprisingly high sequence conservation among some *L.*  
306 *pneumophila* genomes (8, 12).

307

308 This study is, to our knowledge, the largest genomic investigation of environmental and clinical *Legionella*  
309 reported to date from a single jurisdiction and confirms that Lpn-SG1 is an unusual 'edge case' in the  
310 application of genomics in public health microbiology. In the absence of a deep understanding of local *L.*  
311 *pneumophila* population structure (both clinical and environmental) the combination of extreme genomic  
312 monomorphism combined with outbreaks caused by mixed pathogen populations could easily lead to  
313 erroneous conclusions regarding source attribution. Thus, we require new approaches that can better  
314 utilize the genomic information available, and harmoniously combine it with epidemiological evidence, in  
315 order to provide public health officials with useful and timely information.

316

317 **Materials and Methods**

318 **Bacterial strains, growth conditions, case definitions.** *Legionella pneumophila* serogroup 1 isolates were  
319 resuscitated from -80°C storage and assessed. Duplicate isolates from the same patient were excluded  
320 from the study. Isolates were cultured for 48-72 h at 37°C on BCYE agar and re-confirmed serogroup 1 by  
321 latex agglutination (Oxoid). Metadata collected on all isolates included year of isolation and country or city  
322 of isolation. Cases resident in the state of Victoria, Australia, were assessed by the Victorian State  
323 Government public health unit in accordance with national guidelines and an outbreak investigation was  
324 initiated when common exposures were reported by different cases whose onset dates occurred within a  
325 two-week window. ([http://www.health.gov.au/internet/main/publishing.nsf/content/cdna-song-](http://www.health.gov.au/internet/main/publishing.nsf/content/cdna-song-legionella.htm)  
326 [legionella.htm](http://www.health.gov.au/internet/main/publishing.nsf/content/cdna-song-legionella.htm), accessed 31 August 2015). In this manner, we were able to determine the human cases  
327 epidemiologically linked to each other. Many of the outbreaks/infection clusters contained a greater  
328 number of cases than there were isolates as the diagnosis of Legionellosis was made by culture-  
329 independent methods. Complete, closed genomes of *L. pneumophila* that were publicly available were  
330 obtained from GenBank for inclusion in the analysis (Table S1).

331

332 **Sequence based typing.** This was performed as previously described according to the European  
333 Legionnaires' Disease Surveillance Network (ELDSNet) method  
334 ([http://bioinformatics.phe.org.uk/legionella/legionella\\_sbt/php/sbt\\_homepage.php](http://bioinformatics.phe.org.uk/legionella/legionella_sbt/php/sbt_homepage.php), accessed 31 August  
335 2015) (35).

336

337 **DNA sequencing.** DNA libraries were prepared using the NexteraXT DNA preparation kit (Illumina) and  
338 whole genome sequencing was performed on the NextSeq platform (Illumina) with 2x150 bp chemistry. For  
339 single molecule real-time (SMRT) sequencing (Pacific Biosciences), genomic DNA was extracted from  
340 agarose plugs using the CDC Pulsenet Protocol to allow for recovery of high molecular weight, intact DNA  
341 (<http://www.cdc.gov/pulsenet/pathogens>, accessed 31 August 2015). Size-selected 10kb DNA libraries  
342 were prepared according to manufacturers' instructions and sequenced on the RS II platform (Pacific  
343 Biosciences) using P6-C4 chemistry. All sequence reads and the completed genome are available (GenBank  
344 BioProject ID: PRJEB13594)

345

346 ***Legionella pneumophila* serogroup 1 isolate Lpm7613 assembly and closure.** A high quality finished ST 30  
347 reference genome was established for *L. pneumophila* serogroup 1 clinical isolate Lpm7613 using the  
348 SMRT® Analysis System v2.3.0.140936 (Pacific Biosciences). Raw sequence data were *de novo* assembled  
349 using the HGAP v3 protocol with a genome size of 4 Mb. Polished contigs were error corrected using Quiver  
350 v1. The resulting assembly was then checked using BridgeMapper v1 in the SMRT® Analysis System, and the

351 consensus sequence corrected with short-read Illumina data, using the program Snippy  
352 (<https://github.com/tseemann/snippy>). Whole genome annotation was performed using Prokka (17),  
353 preferentially using the *L. pneumophila* Paris strain annotation (16). BRIG was used to visualize BLASTn  
354 DNA:DNA comparisons of *L. pneumophila* Lpm7613 against other *L. pneumophila* genomes (36).  
355 Nomenclature of the genomic islands demonstrated in *L. pneumophila* Lpm7613 was based on previously  
356 described islands (37). CRISPR databases were used to search for CRISPR sequences  
357 (<http://crispi.genouest.org> and <http://crispr.u-psud.fr/Server/>, accessed 14 February 2016).

358

359 **Variant detection and phylogenetic analysis.** The genomes of ten publicly available complete *L.*  
360 *pneumophila* genomes (Table S1) were shredded to generate short *in silico* sequence reads of 250bp and all  
361 244 *L. pneumophila* reads sets were mapped against the Lpm7613 reference genome using Snippy v3.2. An  
362 alignment file from pairwise comparisons of core genome SNPs (with inferred recombining sites removed)  
363 was used as input to FastTree v2.1.8 with double precision (38) to infer a maximum likelihood phylogenetic  
364 tree using the general time reversible model of nucleotide substitution. Branch support was estimated  
365 using 1,000 bootstrap replicates. Resulting trees were visualized in FigTree v1.4.2  
366 (<http://tree.bio.ed.ac.uk/software/figtree/>). Single nucleotide polymorphism (SNP) differences between  
367 isolates were tabulated and visualized using a custom R-script ([https://github.com/MDU-](https://github.com/MDU-PHL/pairwise_snp_differences)  
368 [PHL/pairwise\\_snp\\_differences](https://github.com/MDU-PHL/pairwise_snp_differences)). The core genome SNPs were also used as the input into a Bayesian analysis  
369 of population structure (BAPS) using iterative clustering to a depth of 10 levels and a pre-specified  
370 maximum of 20 clusters (39).

371

372 **Recombination and molecular clock analysis.** Recombination detection was performed using  
373 ClonalFrameML (40), taking as input a full genome alignment (included invariant sites) prepared using  
374 Snippy as above and the ML phylogeny as a guide tree with polytomies removed from the FastTree tree  
375 using a custom python script ([https://github.com/kwongj/nw\\_multi2bifurcation](https://github.com/kwongj/nw_multi2bifurcation)). Results were visualized  
376 using a custom Python script to render separate and superposable images of extant and ancestral inferred  
377 recombination regions (<https://github.com/kwongj/cfml-maskrc>). Molecular clock-likeness of the ML tree  
378 with ClonalFrameML-adjusted branch lengths was assessed using TempEst v1.5  
379 (<http://tree.bio.ed.ac.uk/software/tempest/>).

380

381 **Phylogeographic analysis.** Variant detection for the 64 environmental genomes was undertaken by running  
382 snippy-core. Core SNPs were used to reconstruct a phylogenomic tree with FastTree that was overlaid upon  
383 a base map in GenGIS (41). Victorian population mesh data was downloaded from the Australia Bureau of

384 Statistics webpage  
385 (<http://www.abs.gov.au/AUSSTATS/abs@.nsf/DetailsPage/1270.0.55.001July%202016?OpenDocument>)  
386 and Local Government Area data was downloaded from the Victorian Government Data Directory webpage  
387 ([https://www.data.vic.gov.au/data/dataset/lga-geographical-profiles-2014-beta/resource/f6c49074-0679-](https://www.data.vic.gov.au/data/dataset/lga-geographical-profiles-2014-beta/resource/f6c49074-0679-4c79-a0db-04dac8eda364)  
388 [4c79-a0db-04dac8eda364](https://www.data.vic.gov.au/data/dataset/lga-geographical-profiles-2014-beta/resource/f6c49074-0679-4c79-a0db-04dac8eda364)).

389

390 **DAPC model building using core SNPs.** Discriminant analysis of principal components (DAPC) is a  
391 multivariate method that tries to reconstruct hypothesized subdivisions in a given population (typically  
392 formed from demographic or phenotypic information) using genomic data (42). DAPC was implemented in  
393 the R package *adegenet* v2.0.1 (42). For input, we used a matrix of single nucleotide polymorphisms (SNP)  
394 for all genomes originating from infection clusters that possessed at least one environmental and clinical  
395 representative (Table S1). SNP detection was undertaken by running Snippy and sites that were  
396 recombinogenic and or invariant among the environmental genomes were discarded. An input SNP matrix  
397 of exclusively environmental isolates (hereon referred to as the training set) was used to develop a DAPC  
398 model. The training set subdivisions were based on the geographic origin of the environmental isolates  
399 (Table S1) (23). The resultant model was then tested using clinical isolates (hereon referred to as the  
400 validation set). The ability of the model to predict the environmental source of the validation set genomes  
401 was simulated across the first to the 20th principal components, allowing an optimal number of principal  
402 components to be identified. The optimized model was then used to predict the environmental origin of  
403 the clinical isolate genomes.

404

405 **DAPC model building using cgMLST variation.** In order to detect variants within the recently described  
406 cgMLST regions, reads were mapped to the Lp\_Philadelphia chromosome (NC\_002942.5) using snippy. SNP  
407 profiles from within the cgMLST regions were reduced to allelic integers, with all genes containing zero  
408 coverage or uncertain base-calls, excluded. Allelic integers were concatenated into a matrix and, using the  
409 same DAPC model-building method as mentioned above, models were established using the training set  
410 environmental genomes and used to predict the origin of the validation set clinical isolate genomes.

411

## 412 References

- 413 1. Fields BS, Benson RF, Besser RE. 2002. *Legionella* and Legionnaires' disease: 25 years of  
414 investigation. Clin Microbiol Rev 15:506-526.

- 415 2. **Yu VL, Plouffe JF, Pastoris MC, Stout JE, Schousboe M, Widmer A, Summersgill J, File T, Heath CM,**  
416 **Paterson DL, Chereschsky A.** 2002. Distribution of *Legionella* species and serogroups isolated by  
417 culture in patients with sporadic community-acquired legionellosis: an international collaborative  
418 survey. *J Infect Dis* **186**:127-128.
- 419 3. **Luck C, Fry NK, Helbig JH, Jarraud S, Harrison TG.** 2013. Typing methods for *Legionella*. *Methods*  
420 *Mol Biol* **954**:119-148.
- 421 4. **Mercante JW, Winchell JM.** 2015. Current and emerging *Legionella* diagnostics for laboratory and  
422 outbreak investigations. *Clin Microbiol Rev* **28**:95-133.
- 423 5. **McAdam PR, Vander Broek CW, Lindsay DS, Ward MJ, Hanson MF, Gillies M, Watson M, Stevens**  
424 **JM, Edwards GF, Fitzgerald JR.** 2014. Gene flow in environmental *Legionella pneumophila* leads to  
425 genetic and pathogenic heterogeneity within a Legionnaires' disease outbreak. *Genome Biol*  
426 **15**:504.
- 427 6. **Reuter S, Harrison TG, Koser CU, Ellington MJ, Smith GP, Parkhill J, Peacock SJ, Bentley SD, Torok**  
428 **ME.** 2013. A pilot study of rapid whole-genome sequencing for the investigation of a *Legionella*  
429 outbreak. *BMJ Open* **3**.
- 430 7. **Sanchez-Buso L, Comas I, Jorques G, Gonzalez-Candelas F.** 2014. Recombination drives genome  
431 evolution in outbreak-related *Legionella pneumophila* isolates. *Nat Genet* **46**:1205-1211.
- 432 8. **David S, Afshar B, Mentasti M, Ginevra C, Podglajen I, Harris SR, Chalker VJ, Jarraud S, Harrison**  
433 **TG, Parkhill J.** 2017. Seeding and Establishment of *Legionella pneumophila* in Hospitals:  
434 Implications for Genomic Investigations of Nosocomial Legionnaires' Disease. *Clin Infect Dis*  
435 **64**:1251-1259.
- 436 9. **Weiss D, Boyd C, Rakeman JL, Greene SK, Fitzhenry R, McProud T, Musser K, Huang L, Kornblum J,**  
437 **Nazarian EJ, Fine AD, Braunstein SL, Kass D, Landman K, Lapierre P, Hughes S, Tran A, Taylor J,**  
438 **Baker D, Jones L, Kornstein L, Liu B, Perez R, Lucero DE, Peterson E, Benowitz I, Lee KF, Ngai S,**  
439 **Stripling M, Varma JK, South Bronx Legionnaires' Disease Investigation T.** 2017. A Large  
440 Community Outbreak of Legionnaires' Disease Associated With a Cooling Tower in New York City,  
441 2015. *Public Health Rep* **132**:241-250.
- 442 10. **Sanchez-Buso L, Guiral S, Crespi S, Moya V, Camaro ML, Olmos MP, Adrian F, Morera V, Gonzalez-**  
443 **Moran F, Vanaclocha H, Gonzalez-Candelas F.** 2015. Genomic Investigation of a Legionellosis  
444 Outbreak in a Persistently Colonized Hotel. *Front Microbiol* **6**:1556.

- 445 11. **Underwood AP, Jones G, Mentasti M, Fry NK, Harrison TG.** 2013. Comparison of the *Legionella*  
446 *pneumophila* population structure as determined by sequence-based typing and whole genome  
447 sequencing. *BMC Microbiol* **13**:302.
- 448 12. **David S, Rusniok C, Mentasti M, Gomez-Valero L, Harris SR, Lechat P, Lees, J., Ginerva C, Glaser C,**  
449 **Ma L, Bouchier C, Underwood A, Jarraud S, Harrison TG, Parkhill J, Buchrieser C.** 2016. Multiple  
450 major disease-associated clones of *Legionella pneumophila* have emerged recently and  
451 independently. *Genome Res* **In press**.
- 452 13. **Schjorring S, Stegger M, Kjelso C, Lilje B, Bangsbo JM, Petersen RF, David S, Uldum SA,**  
453 **Infections ESGfL.** 2017. Genomic investigation of a suspected outbreak of *Legionella pneumophila*  
454 ST82 reveals undetected heterogeneity by the present gold-standard methods, Denmark, July to  
455 November 2014. *Euro Surveill* **22**.
- 456 14. **Anon.** 2014. Communicable Disease Surveillance, Victoria, Oct-Dec 2014. *Victorian Infectious*  
457 *Diseases Bulletin* **17**:22-23.
- 458 15. **Greig JE, Carnie JA, Tallis GF, Ryan NJ, Tan AG, Gordon IR, Zwolak B, Leydon JA, Guest CS, Hart**  
459 **WG.** 2004. An outbreak of Legionnaires' disease at the Melbourne Aquarium, April 2000:  
460 investigation and case-control studies. *Med J Aust* **180**:566-572.
- 461 16. **Cazalet C, Rusniok C, Bruggemann H, Zidane N, Magnier A, Ma L, Tichit M, Jarraud S, Bouchier C,**  
462 **Vandenesch F, Kunst F, Etienne J, Glaser P, Buchrieser C.** 2004. Evidence in the *Legionella*  
463 *pneumophila* genome for exploitation of host cell functions and high genome plasticity. *Nat Genet*  
464 **36**:1165-1173.
- 465 17. **Seemann T.** 2014. Prokka: rapid prokaryotic genome annotation. *Bioinformatics* **30**:2068-2069.
- 466 18. **Rao C, Guyard C, Pelaz C, Wasserscheid J, Bondy-Denomy J, Dewar K, Ensminger AW.** 2016. Active  
467 and Adaptive *Legionella* CRISPR-Cas reveals a recurrent challenge to the pathogen. *Cell Microbiol*  
468 doi:10.1111/cmi.12586.
- 469 19. **Coscolla M, Gonzalez-Candelas F.** 2007. Population structure and recombination in environmental  
470 isolates of *Legionella pneumophila*. *Environ Microbiol* **9**:643-656.
- 471 20. **Coscolla M, Gonzalez-Candelas F.** 2009. Comparison of clinical and environmental samples of  
472 *Legionella pneumophila* at the nucleotide sequence level. *Infect Genet Evol* **9**:882-888.
- 473 21. **Gomez-Valero L, Rusniok C, Jarraud S, Vacherie B, Rouy Z, Barbe V, Medigue C, Etienne J,**  
474 **Buchrieser C.** 2011. Extensive recombination events and horizontal gene transfer shaped the  
475 *Legionella pneumophila* genomes. *BMC Genomics* **12**:536.

- 476 22. **Costa J, Teixeira PG, d'Avo AF, Junior CS, Verissimo A.** 2014. Intragenic recombination has a critical  
477 role on the evolution of *Legionella pneumophila* virulence-related effector sidJ. PLoS One  
478 9:e109840.
- 479 23. **Jombart T, Devillard S, Balloux F.** 2010. Discriminant analysis of principal components: a new  
480 method for the analysis of genetically structured populations. BMC Genet 11:94.
- 481 24. **McNally A, Oren Y, Kelly D, Pascoe B, Dunn S, Sreecharan T, Vehkala M, Valimaki N, Prentice MB,**  
482 **Ashour A, Avram O, Pupko T, Dobrindt U, Literak I, Guenther S, Schaufler K, Wieler LH, Zhiyong Z,**  
483 **Sheppard SK, McInerney JO, Corander J.** 2016. Combined Analysis of Variation in Core, Accessory  
484 and Regulatory Genome Regions Provides a Super-Resolution View into the Evolution of Bacterial  
485 Populations. PLoS Genet 12:e1006280.
- 486 25. **David S, Mentasti M, Tewolde R, Aslett M, Harris SR, Afshar B, Underwood A, Fry NK, Parkhill J,**  
487 **Harrison TG.** 2016. Evaluation of an optimal epidemiologic typing scheme for *Legionella*  
488 *pneumophila* with whole genome sequence data using validation guidelines. J Clin Microbiol  
489 doi:10.1128/JCM.00432-16.
- 490 26. **Moran-Gilad J, Prior K, Yakunin E, Harrison TG, Underwood A, Lazarovitch T, Valinsky L, Luck C,**  
491 **Krux F, Agmon V, Grotto I, Harmsen D.** 2015. Design and application of a core genome multilocus  
492 sequence typing scheme for investigation of Legionnaires' disease incidents. Euro Surveill 20.
- 493 27. **Bartley PB, Ben Zakour NL, Stanton-Cook M, Muguli R, Prado L, Garnys V, Taylor K, Barnett TC,**  
494 **Pinna G, Robson J, Paterson DL, Walker MJ, Schembri MA, Beatson SA.** 2016. Hospital-wide  
495 Eradication of a Nosocomial *Legionella pneumophila* Serogroup 1 Outbreak. Clin Infect Dis 62:273-  
496 279.
- 497 28. **Kwong JC, Mercoulia K, Tomita T, Easton M, Li HY, Bulach DM, Stinear TP, Seemann T, Howden**  
498 **BP.** 2016. Prospective Whole-Genome Sequencing Enhances National Surveillance of *Listeria*  
499 *monocytogenes*. J Clin Microbiol 54:333-342.
- 500 29. **Graham RM, Doyle CJ, Jennison AV.** 2014. Real-time investigation of a *Legionella pneumophila*  
501 outbreak using whole genome sequencing. Epidemiol Infect 142:2347-2351.
- 502 30. **Sanchez-Buso L, Olmos MP, Camaro ML, Adrian F, Calafat JM, Gonzalez-Candelas F.** 2015.  
503 Phylogenetic analysis of environmental *Legionella pneumophila* isolates from an endemic area  
504 (Alcoy, Spain). Infect Genet Evol 30:45-54.
- 505 31. **Coscolla M, Fernandez C, Colomina J, Sanchez-Buso L, Gonzalez-Candelas F.** 2014. Mixed infection  
506 by *Legionella pneumophila* in outbreak patients. Int J Med Microbiol 304:307-313.



- 507 32. **Diederen BM, de Jong CM, Aarts I, Peeters MF, van der Zee A.** 2007. Molecular evidence for the  
508 ubiquitous presence of *Legionella* species in Dutch tap water installations. *J Water Health* **5**:375-  
509 383.
- 510 33. **Rivera JM, Aguilar L, Granizo JJ, Vos-Arenilla A, Gimenez MJ, Aguiar JM, Prieto J.** 2007. Isolation of  
511 *Legionella* species/serogroups from water cooling systems compared with potable water systems in  
512 Spanish healthcare facilities. *J Hosp Infect* **67**:360-366.
- 513 34. **Storey MV, Langmark J, Ashbolt NJ, Stenstrom TA.** 2004. The fate of legionellae within distribution  
514 pipe biofilms: measurement of their persistence, inactivation and detachment. *Water Sci Technol*  
515 **49**:269-275.
- 516 35. **Gaia V, Fry NK, Afshar B, Luck PC, Meugnier H, Etienne J, Peduzzi R, Harrison TG.** 2005. Consensus  
517 sequence-based scheme for epidemiological typing of clinical and environmental isolates of  
518 *Legionella pneumophila*. *J Clin Microbiol* **43**:2047-2052.
- 519 36. **Alikhan NF, Petty NK, Ben Zakour NL, Beatson SA.** 2011. BLAST Ring Image Generator (BRIG):  
520 simple prokaryote genome comparisons. *BMC Genomics* **12**:402.
- 521 37. **D'Auria G, Jimenez-Hernandez N, Peris-Bondia F, Moya A, Latorre A.** 2010. *Legionella*  
522 *pneumophila* pangenome reveals strain-specific virulence factors. *BMC Genomics* **11**:181.
- 523 38. **Price MN, Dehal PS, Arkin AP.** 2010. FastTree 2--approximately maximum-likelihood trees for large  
524 alignments. *PLoS One* **5**:e9490.
- 525 39. **Cheng L, Connor TR, Siren J, Aanensen DM, Corander J.** 2013. Hierarchical and spatially explicit  
526 clustering of DNA sequences with BAPS software. *Mol Biol Evol* **30**:1224-1228.
- 527 40. **Didelot X, Wilson DJ.** 2015. ClonalFrameML: efficient inference of recombination in whole bacterial  
528 genomes. *PLoS Comput Biol* **11**:e1004041.
- 529 41. **Parks DH, Mankowski T, Zangoeei S, Porter MS, Armanini DG, Baird DJ, Langille MG, Beiko RG.**  
530 2013. GenGIS 2: geospatial analysis of traditional and genetic biodiversity, with new gradient  
531 algorithms and an extensible plugin framework. *PLoS One* **8**:e69885.
- 532 42. **Jombart T, Ahmed I.** 2011. adegenet 1.3-1: new tools for the analysis of genome-wide SNP data.  
533 *Bioinformatics* **27**:3070-3071.
- 534

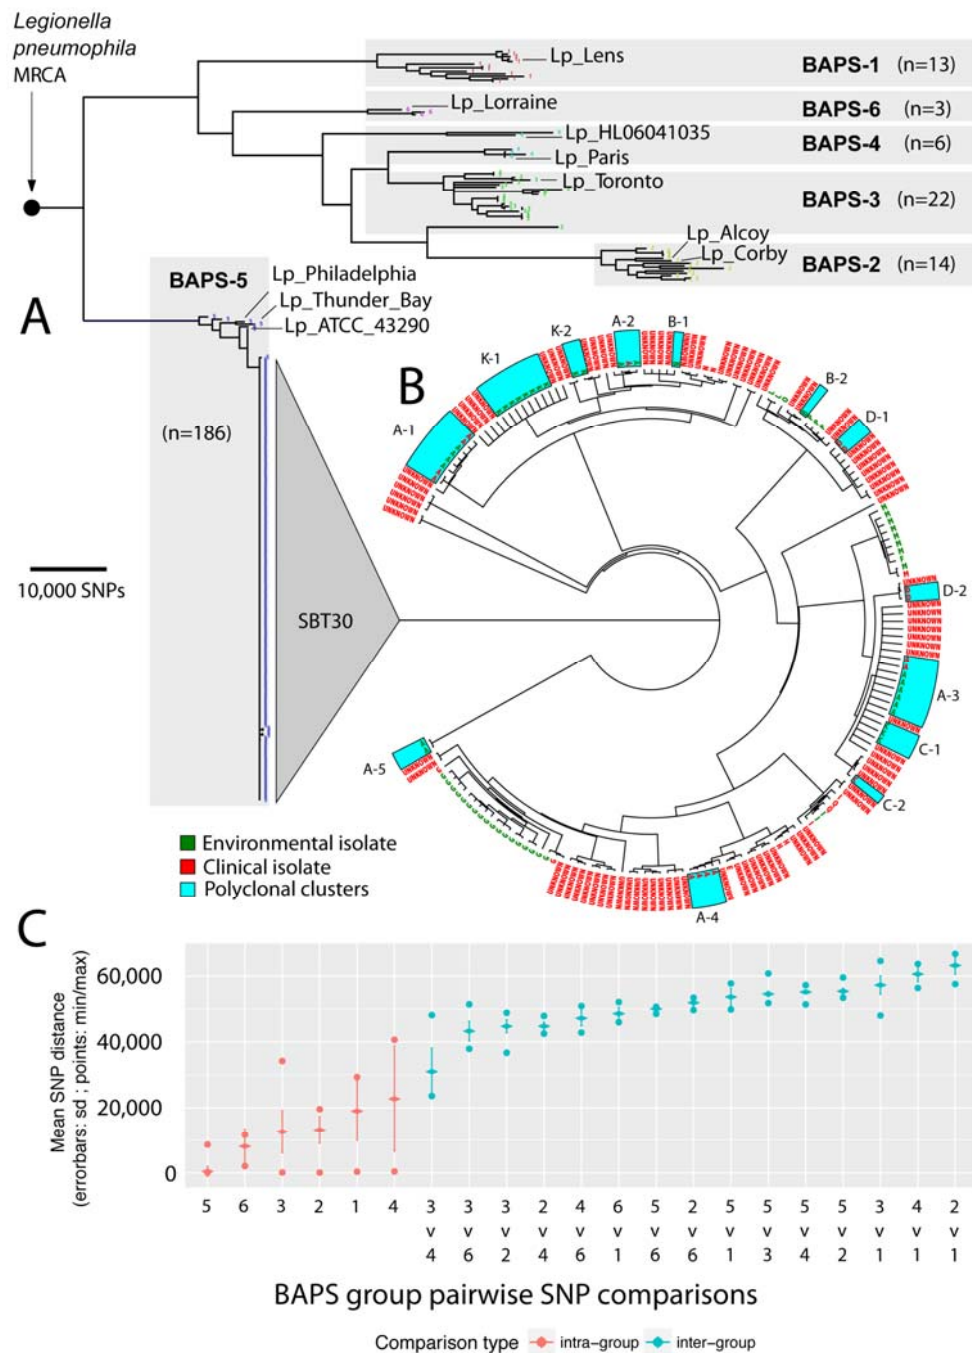

535 **Figures**

536

537 **Fig. 1: Global *Legionella pneumophila* population clustering, phylogenomics and genomic molecular**  
 538 **epidemiology of local outbreaks.** (A) Core genome phylogeny estimated using maximum likelihood  
 539 corresponds with six BAPS groups. Branches with less than 70% bootstrap support were collapsed and scale  
 540 indicates the number of core SNPs. The locations of the ten international genomes are labeled. (B) ST30

541 core genome phylogeny. Tree tips are labeled with outbreak codes. Environmental and clinical isolates are  
542 colored according to the key. Polyclonal outbreaks/case clusters are highlighted with blue boxes. Branch  
543 lengths have been transformed and are proportional to the number of nodes under each parent node. (C)  
544 Core genome pairwise SNP comparisons of within and between BAPS groups. All groups had smaller within  
545 group diversity compared to comparisons between groups.

546

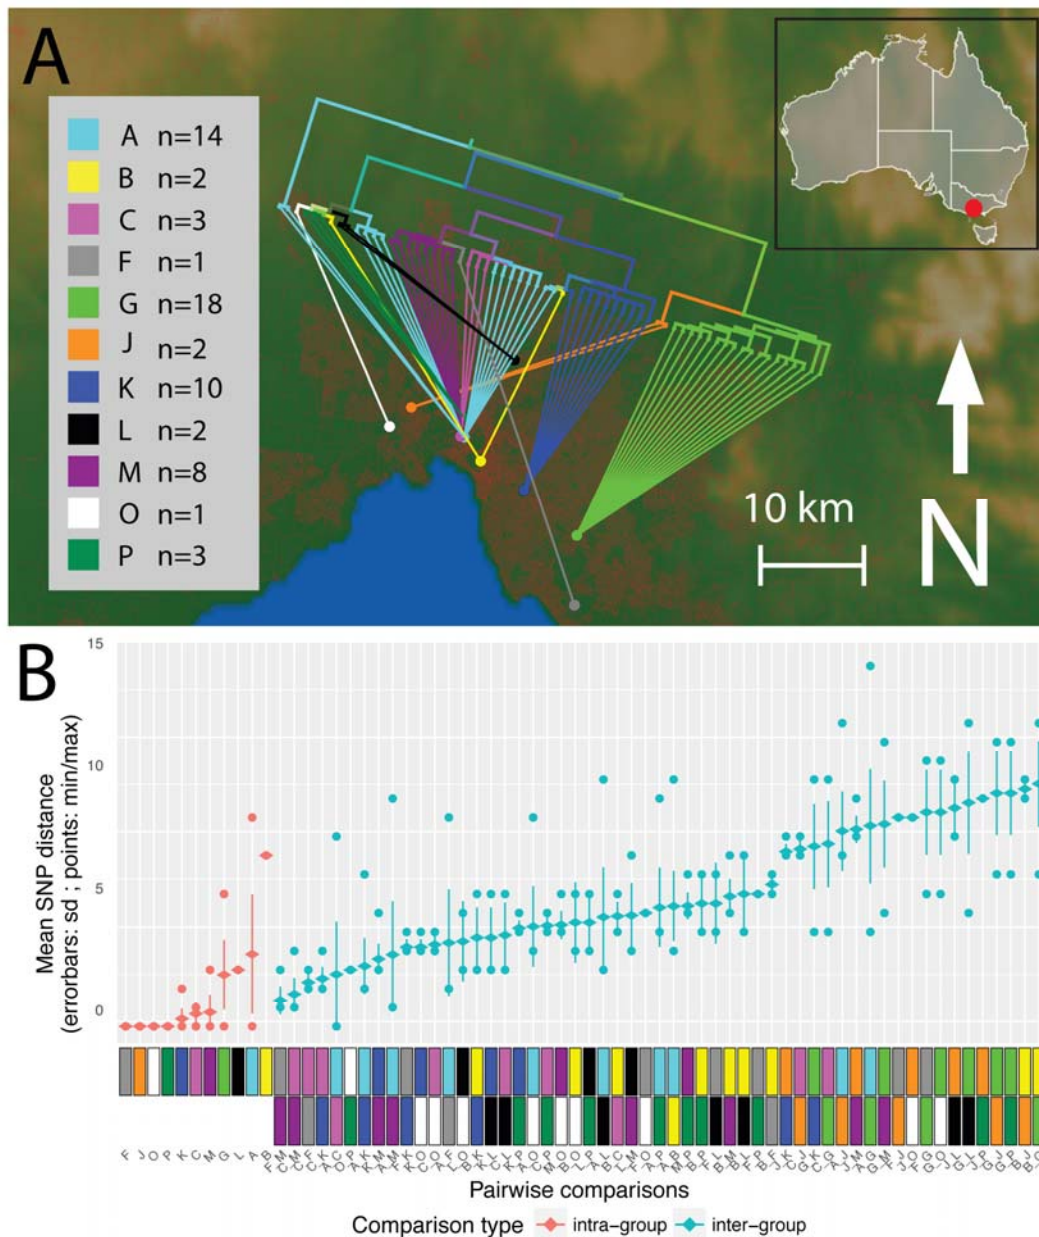

547

548 **Fig. 2: Phylogeography of 64 Lpn-SG1 environmental isolate genomes.** (A) Map of the greater Melbourne  
 549 area, showing the location of the 11 cooling towers assessed during Legionellosis outbreaks, designated by  
 550 colored circles. 'A' (light blue) represents the location Melbourne aquarium outbreak and is close to the  
 551 centre of Melbourne. Inset shows the location of Melbourne (red circle) within the State of Victoria in  
 552 south east Australia. Overall the phylogeny aligns closely with the geography of originating cooling towers.  
 553 For several outbreak codes polyclonality is apparent, as some common origins have connecting lines drawn  
 554 from different sub-clades of the phylogeny. Red coloration on the base map represents population density  
 555 within the greater Melbourne region. The branch lengths of the trees have been transformed and are  
 556 proportional to the number of nodes under each parent node. (B) Core genome pairwise SNP comparisons

557 of within, and between, cooling tower isolate groups. Comparisons of specific epidemiologically defined  
558 groups (infection clusters) are indicated with color codes as defined in the key. All groups had smaller  
559 within diversity than between group diversity.

560

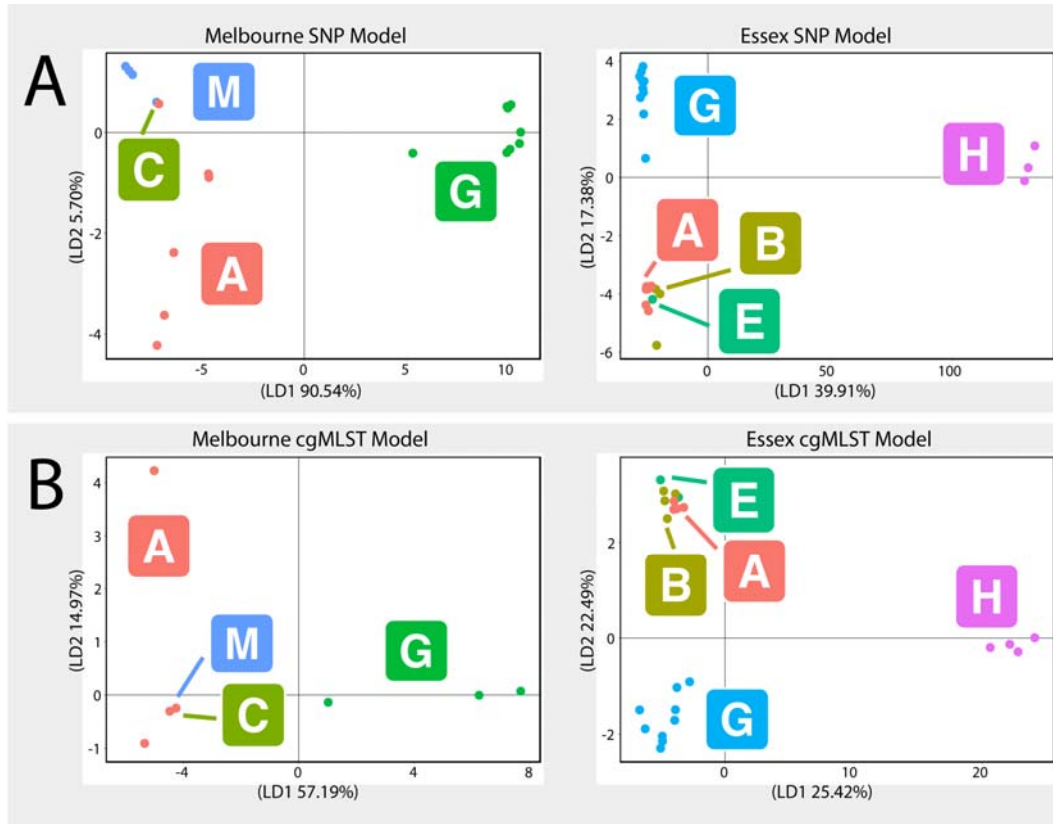

561

562

563

564 **Fig. 3. Scatterplots resulting from discriminant analysis of principal components (DAPC).** (A): Core genome  
565 single nucleotide polymorphisms (SNP) based models of the Melbourne (top left) and Essex (top right)  
566 datasets and; (B): core genome MLST (cgMLST) based models of the Melbourne (bottom left) and Essex  
567 (bottom right) datasets. The membership of each point within an epidemiologically defined cluster (e.g. "A"  
568 is the Melbourne Aquarium outbreak) is indicated by the colored circles and the corresponding letters  
569 labeled within squares. The amount of variation explained by the first and second discriminant functions  
570 are specified on the axes of each plot.

571

572

573

574

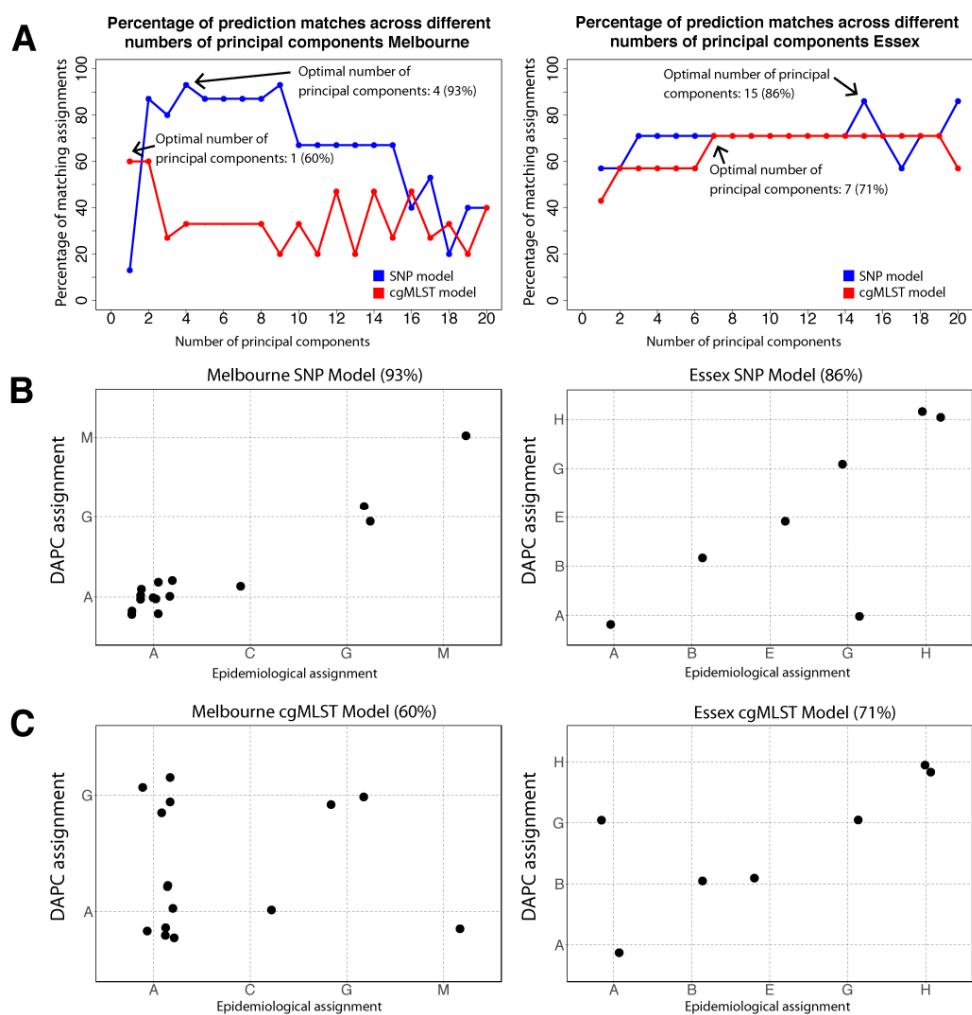

575

576 **Fig. 4: Discriminatory analysis of principal components (DAPC) modeling of Lpn-SG1 genomic data.** (A)  
 577 Model comparison plots depicting the percentage of matches between the predicted and epidemiologically  
 578 determined groupings of the validation set genomes across a range of 1-20 principal components for single  
 579 nucleotide polymorphisms (SNP) and core genome MLST (cgMLST) DAPC models for the Melbourne and  
 580 Essex datasets. The retention of four and one principal components was found to be optimal for the SNP  
 581 (93% match) and cgMLST (60% match) models in Melbourne, respectively, while 15 and seven principal  
 582 components were found to be optimal for the SNP (86% match) and cgMLST (71% match) models in the  
 583 Essex hospital, respectively. (B) Assignment plots depicting the ability of the SNP models to predict the  
 584 source attribution of the validation set clinical isolate genomes for the Melbourne and Essex hospital  
 585 datasets. (C) Assignment plots depicting the ability of the cgMLST models to predict the source attribution  
 586 of the validation set clinical isolate genomes for the Melbourne and Essex hospital datasets.
